# Supplementary material for: Four-dimensional trapped ion mobility spectrometry lipidomics for high throughput clinical profiling of human blood samples
Source: Springer Nature journal article supplement (doi:10.1038/s41467-023-36520-1), 2023-02-20
Supplement: MOESM14 [file 41467_2023_36520_MOESM14_ESM.pdf]

Eppendorf AG  
Barkhausenweg 1  
22339 Hamburg  
Germany

---

|                         |                               |
|-------------------------|-------------------------------|
| <b>User</b>             | user                          |
| <b>Device</b>           | 5073JK706157                  |
| <b>Logfile</b>          |                               |
| <b>Logfile Path</b>     | Home                          |
| <b>Logfile Created</b>  |                               |
| <b>Software version</b> | Device: 18.4 Server: 40.7.2.8 |
| <b>Application</b>      |                               |
| <b>Created</b>          |                               |
| <b>Last modified</b>    |                               |
| <b>Path</b>             | Home                          |
| <b>Comment</b>          |                               |

Eppendorf epMotion

-----  
Method name and path :

Date of Run :

Last edit :

Firmware version : epMotion 18.04

Software version : 40.7.2.8

TIME----- COMMAND----- INFORMATION-----

4:19:08 PM Program Init

4:19:08 PM Program Collect

4:19:12 PM !Dialog Text: Number of samples

Reply: 1

Answer: 32

4:19:15 PM Program Check

4:19:15 PM Application runner settings

Levels: ON

Tips: ON

Locations: ON

Eppendorf AG  
Barkhausenweg 1  
22339 Hamburg  
Germany

---

Vessel caps: OFF

Auto tool selection: OFF

4:19:26 PM HEPA unit: OFF

4:19:26 PM !!! WARNING !!! Device setup is invalid. Please contact service.

4:19:37 PM Location scan: Slot TMX, height 45.913 mm

4:19:36 PM Level Name: DWP 2mL, Labware: dws/plates/dwp96/EP\_DWP\_2000\_1

Position: A1, Volume: 0µl

Position: A2, Volume: 0µl

Position: A3, Volume: 0µl

Position: A4, Volume: 0µl

Position: B1, Volume: 0µl

Position: B2, Volume: 0µl

Position: B3, Volume: 0µl

Position: B4, Volume: 0µl

Position: C1, Volume: 0µl

Position: C2, Volume: 0µl

Position: C3, Volume: 0µl

Position: C4, Volume: 0µl

Position: D1, Volume: 0µl

Position: D2, Volume: 0µl

Position: D3, Volume: 0µl

Position: D4, Volume: 0µl

Position: E1, Volume: 0µl

Position: E2, Volume: 0µl

Position: E3, Volume: 0µl

Position: E4, Volume: 0µl

Position: F1, Volume: 0µl

Position: F2, Volume: 0µl

Position: F3, Volume: 0µl

Position: F4, Volume: 0µl

Position: G1, Volume: 0µl

Position: G2, Volume: 0µl

Position: G3, Volume: 0µl

Position: G4, Volume: 0µl

Position: H1, Volume: 0µl

Position: H2, Volume: 0µl

Position: H3, Volume: 0µl

Position: H4, Volume: 0µl

4:19:41 PM Location scan: Slot A2, height 99.767 mm

4:19:55 PM Genuine Eppendorf tips found in slot A2

Eppendorf AG  
Barkhausenweg 1  
22339 Hamburg  
Germany

---

4:20:07 PM Tip Scan      Name: tip1000f\_1, Labware: dws/tips/tip1000f, Number of tips: 16

4:20:11 PM Location scan:      Slot B1, height 43.022 mm

4:20:11 PM Level      Name: DWP\_1mL, Labware: dws/plates/dwp96/EP\_DWP\_1000\_1

Position: A1, Volume: 0µl  
Position: A2, Volume: 0µl  
Position: A3, Volume: 0µl  
Position: A4, Volume: 0µl  
Position: B1, Volume: 0µl  
Position: B2, Volume: 0µl  
Position: B3, Volume: 0µl  
Position: B4, Volume: 0µl  
Position: C1, Volume: 0µl  
Position: C2, Volume: 0µl  
Position: C3, Volume: 0µl  
Position: C4, Volume: 0µl  
Position: D1, Volume: 0µl  
Position: D2, Volume: 0µl  
Position: D3, Volume: 0µl  
Position: D4, Volume: 0µl  
Position: E1, Volume: 0µl  
Position: E2, Volume: 0µl  
Position: E3, Volume: 0µl  
Position: E4, Volume: 0µl  
Position: F1, Volume: 0µl  
Position: F2, Volume: 0µl  
Position: F3, Volume: 0µl  
Position: F4, Volume: 0µl  
Position: G1, Volume: 0µl  
Position: G2, Volume: 0µl  
Position: G3, Volume: 0µl  
Position: G4, Volume: 0µl  
Position: H1, Volume: 0µl  
Position: H2, Volume: 0µl  
Position: H3, Volume: 0µl  
Position: H4, Volume: 0µl

4:20:15 PM Location scan:      Slot B2, height 58.974 mm

4:20:30 PM Genuine Eppendorf tips found in slot B2

4:20:43 PM Tip Scan      Name: tip300f\_1, Labware: dws/tips/tip300f, Number of tips: 24

4:21:39 PM IDialog      Text: Checking

Reply: 1

Eppendorf AG  
Barkhausenweg 1  
22339 Hamburg  
Germany

---

Answer: Repeat scan  
4:21:58 PM IDialog Text: Checking  
Reply: 1  
Answer: Repeat scan  
4:22:53 PM Level Name: SOLVENTS, Labware: dws/th/solvents  
Position: 1, Volume: 59827.5µl  
Position: 2, Volume: 15982µl  
Position: 3, Volume: 7694µl  
4:22:58 PM Location scan: Slot C1, height 59.010 mm  
4:23:13 PM Genuine Eppendorf tips found in slot C1  
4:23:25 PM Tip Scan Name: tip50f\_1, Labware: dws/tips/tip50f, Number of tips: 72  
4:23:28 PM Tool Scan Position: Gripper, Code: N/A  
4:23:31 PM Tool Scan Position: T1, Code: D\_50\_8, serial number: 1002123  
4:23:34 PM Tool Scan Position: T2, Code: D\_1000\_8, serial number: 4213521  
4:23:37 PM Tool Scan Position: T3, Code: D\_300\_8, serial number: 224322K  
4:23:50 PM 1 Thermomixer Temperature: 8°C  
Current Temperature: 20°C  
4:23:50 PM 2 Comment Transfer Probe in 2mL DWP  
4:23:50 PM 3 Comment Zugabe MTBE  
4:23:50 PM 4 Reagent Transfer  
Source:  
Name: SOLVENTS, Labware: dws/th/solvents  
Destination:  
Name: DWP 2mL, Labware: dws/plates/dwp96/EP\_DWP\_2000\_1  
Number of samples: 32  
Tool: TM\_1000\_8, Filter tips: Yes, Liquid: Alcohol 98%  
Volume: 615µl, Transfer type: Pipette  
Change tips: when command finished after 6 aspirations  
Dispose tips into waste.  
Options: Aspirate from bottom, dispense 5 from liquid level, follow liquid level change  
Changes in liquid types:  
Speed aspiration: 4.0mm/sec, Speed dispense: 4.0mm/sec  
Liquid offset aspiration: 3.0mm, Liquid offset dispense: -3.0mm  
Delay blow: 0ms, Speed blow: 0.4mm/sec  
Movement blow: 0%, Initial stroke: 100%  
Prewetting: 1 cycles  
4:24:02 PM New tip acquired from tip1000f\_1, A11  
4:24:32 PM Source: SOLVENTS, Position: 1, Well volume: 54907.5µl  
4:24:40 PM Destination: DWP 2mL, Position: A1, Well volume: 615.0µl  
4:24:40 PM Destination: DWP 2mL, Position: B1, Well volume: 615.0µl

Eppendorf AG  
Barkhausenweg 1  
22339 Hamburg  
Germany

---

4:24:40 PM Destination: DWP 2mL, Position: C1, Well volume: 615.0µl  
4:24:40 PM Destination: DWP 2mL, Position: D1, Well volume: 615.0µl  
4:24:40 PM Destination: DWP 2mL, Position: E1, Well volume: 615.0µl  
4:24:40 PM Destination: DWP 2mL, Position: F1, Well volume: 615.0µl  
4:24:40 PM Destination: DWP 2mL, Position: G1, Well volume: 615.0µl  
4:24:40 PM Destination: DWP 2mL, Position: H1, Well volume: 615.0µl  
4:24:53 PM Source: SOLVENTS, Position: 1, Well volume: 49987.5µl  
4:25:01 PM Destination: DWP 2mL, Position: A2, Well volume: 615.0µl  
4:25:01 PM Destination: DWP 2mL, Position: B2, Well volume: 615.0µl  
4:25:01 PM Destination: DWP 2mL, Position: C2, Well volume: 615.0µl  
4:25:01 PM Destination: DWP 2mL, Position: D2, Well volume: 615.0µl  
4:25:01 PM Destination: DWP 2mL, Position: E2, Well volume: 615.0µl  
4:25:01 PM Destination: DWP 2mL, Position: F2, Well volume: 615.0µl  
4:25:01 PM Destination: DWP 2mL, Position: G2, Well volume: 615.0µl  
4:25:01 PM Destination: DWP 2mL, Position: H2, Well volume: 615.0µl  
4:25:15 PM Source: SOLVENTS, Position: 1, Well volume: 45067.5µl  
4:25:22 PM Destination: DWP 2mL, Position: A3, Well volume: 615.0µl  
4:25:22 PM Destination: DWP 2mL, Position: B3, Well volume: 615.0µl  
4:25:22 PM Destination: DWP 2mL, Position: C3, Well volume: 615.0µl  
4:25:22 PM Destination: DWP 2mL, Position: D3, Well volume: 615.0µl  
4:25:22 PM Destination: DWP 2mL, Position: E3, Well volume: 615.0µl  
4:25:22 PM Destination: DWP 2mL, Position: F3, Well volume: 615.0µl  
4:25:22 PM Destination: DWP 2mL, Position: G3, Well volume: 615.0µl  
4:25:22 PM Destination: DWP 2mL, Position: H3, Well volume: 615.0µl  
4:25:36 PM Source: SOLVENTS, Position: 1, Well volume: 40147.5µl  
4:25:43 PM Destination: DWP 2mL, Position: A4, Well volume: 615.0µl  
4:25:43 PM Destination: DWP 2mL, Position: B4, Well volume: 615.0µl  
4:25:43 PM Destination: DWP 2mL, Position: C4, Well volume: 615.0µl  
4:25:43 PM Destination: DWP 2mL, Position: D4, Well volume: 615.0µl  
4:25:43 PM Destination: DWP 2mL, Position: E4, Well volume: 615.0µl  
4:25:43 PM Destination: DWP 2mL, Position: F4, Well volume: 615.0µl  
4:25:43 PM Destination: DWP 2mL, Position: G4, Well volume: 615.0µl  
4:25:43 PM Destination: DWP 2mL, Position: H4, Well volume: 615.0µl  
4:25:50 PM Tip disposed.  
4:25:54 PM 5 Comment      Zugabe 200µL 0,1% FA  
4:25:54 PM 6 Reagent Transfer  
    Source:  
    Name: SOLVENTS, Labware: dws/th/solvents  
    Destination:  
    Name: DWP 2mL, Labware: dws/plates/dwp96/EP\_DWP\_2000\_1

---

Eppendorf AG  
Barkhausenweg 1  
22339 Hamburg  
Germany

---

Number of samples: 32

Tool: TM\_300\_8, Filter tips: Yes, Liquid: Water

Volume: 200µl, Transfer type: Pipette

Change tips: when command finished after 6 aspirations

Dispose tips into waste.

Options: dispense 5 from liquid level, follow liquid level change

4:26:17 PM New tip acquired from tip300f\_1, A10

4:26:22 PM Source: SOLVENTS, Position: 2, Well volume: 14382.0µl

4:26:26 PM Destination: DWP 2mL, Position: A1, Well volume: 815.0µl

4:26:26 PM Destination: DWP 2mL, Position: B1, Well volume: 815.0µl

4:26:26 PM Destination: DWP 2mL, Position: C1, Well volume: 815.0µl

4:26:26 PM Destination: DWP 2mL, Position: D1, Well volume: 815.0µl

4:26:26 PM Destination: DWP 2mL, Position: E1, Well volume: 815.0µl

4:26:26 PM Destination: DWP 2mL, Position: F1, Well volume: 815.0µl

4:26:26 PM Destination: DWP 2mL, Position: G1, Well volume: 815.0µl

4:26:26 PM Destination: DWP 2mL, Position: H1, Well volume: 815.0µl

4:26:30 PM Source: SOLVENTS, Position: 2, Well volume: 12782.0µl

4:26:34 PM Destination: DWP 2mL, Position: A2, Well volume: 815.0µl

4:26:34 PM Destination: DWP 2mL, Position: B2, Well volume: 815.0µl

4:26:34 PM Destination: DWP 2mL, Position: C2, Well volume: 815.0µl

4:26:34 PM Destination: DWP 2mL, Position: D2, Well volume: 815.0µl

4:26:34 PM Destination: DWP 2mL, Position: E2, Well volume: 815.0µl

4:26:34 PM Destination: DWP 2mL, Position: F2, Well volume: 815.0µl

4:26:34 PM Destination: DWP 2mL, Position: G2, Well volume: 815.0µl

4:26:34 PM Destination: DWP 2mL, Position: H2, Well volume: 815.0µl

4:26:39 PM Source: SOLVENTS, Position: 2, Well volume: 11182.0µl

4:26:42 PM Destination: DWP 2mL, Position: A3, Well volume: 815.0µl

4:26:42 PM Destination: DWP 2mL, Position: B3, Well volume: 815.0µl

4:26:42 PM Destination: DWP 2mL, Position: C3, Well volume: 815.0µl

4:26:42 PM Destination: DWP 2mL, Position: D3, Well volume: 815.0µl

4:26:42 PM Destination: DWP 2mL, Position: E3, Well volume: 815.0µl

4:26:42 PM Destination: DWP 2mL, Position: F3, Well volume: 815.0µl

4:26:42 PM Destination: DWP 2mL, Position: G3, Well volume: 815.0µl

4:26:42 PM Destination: DWP 2mL, Position: H3, Well volume: 815.0µl

4:26:47 PM Source: SOLVENTS, Position: 2, Well volume: 9582.0µl

4:26:50 PM Destination: DWP 2mL, Position: A4, Well volume: 815.0µl

4:26:50 PM Destination: DWP 2mL, Position: B4, Well volume: 815.0µl

4:26:50 PM Destination: DWP 2mL, Position: C4, Well volume: 815.0µl

4:26:50 PM Destination: DWP 2mL, Position: D4, Well volume: 815.0µl

4:26:50 PM Destination: DWP 2mL, Position: E4, Well volume: 815.0µl

Eppendorf AG  
Barkhausenweg 1  
22339 Hamburg  
Germany

---

4:26:50 PM Destination: DWP 2mL, Position: F4, Well volume: 815.0µl  
4:26:50 PM Destination: DWP 2mL, Position: G4, Well volume: 815.0µl  
4:26:50 PM Destination: DWP 2mL, Position: H4, Well volume: 815.0µl  
4:26:58 PM Tip disposed.  
4:27:02 PM 7 Comment Spike ISTD  
4:27:02 PM 8 Reagent Transfer  
Source:  
Name: SOLVENTS, Labware: dws/th/solvents  
Destination:  
Name: DWP 2mL, Labware: dws/plates/dwp96/EP\_DWP\_2000\_1  
Number of samples: 32  
Tool: TM\_300\_8, Filter tips: Yes, Liquid: Alcohol 98%  
Volume: 185µl, Transfer type: Pipette  
Change tips: before each aspiration  
Dispose tips into waste.  
Options: dispense 5 from liquid level, follow liquid level change  
4:27:07 PM New tip acquired from tip300f\_1, A11  
4:27:20 PM Source: SOLVENTS, Position: 3, Well volume: 6214.0µl  
4:27:25 PM Destination: DWP 2mL, Position: A1, Well volume: 1000.0µl  
4:27:25 PM Destination: DWP 2mL, Position: B1, Well volume: 1000.0µl  
4:27:25 PM Destination: DWP 2mL, Position: C1, Well volume: 1000.0µl  
4:27:25 PM Destination: DWP 2mL, Position: D1, Well volume: 1000.0µl  
4:27:25 PM Destination: DWP 2mL, Position: E1, Well volume: 1000.0µl  
4:27:25 PM Destination: DWP 2mL, Position: F1, Well volume: 1000.0µl  
4:27:25 PM Destination: DWP 2mL, Position: G1, Well volume: 1000.0µl  
4:27:25 PM Destination: DWP 2mL, Position: H1, Well volume: 1000.0µl  
4:27:32 PM Tip disposed.  
4:27:40 PM New tip acquired from tip300f\_1, A12  
4:27:53 PM Source: SOLVENTS, Position: 3, Well volume: 4734.0µl  
4:27:58 PM Destination: DWP 2mL, Position: A2, Well volume: 1000.0µl  
4:27:58 PM Destination: DWP 2mL, Position: B2, Well volume: 1000.0µl  
4:27:58 PM Destination: DWP 2mL, Position: C2, Well volume: 1000.0µl  
4:27:58 PM Destination: DWP 2mL, Position: D2, Well volume: 1000.0µl  
4:27:58 PM Destination: DWP 2mL, Position: E2, Well volume: 1000.0µl  
4:27:58 PM Destination: DWP 2mL, Position: F2, Well volume: 1000.0µl  
4:27:58 PM Destination: DWP 2mL, Position: G2, Well volume: 1000.0µl  
4:27:58 PM Destination: DWP 2mL, Position: H2, Well volume: 1000.0µl  
4:28:05 PM Tip disposed.  
4:28:18 PM IDialog Text: Please insert new tips for 300 µl with filter in slot B2 (tip300f\_1)

---

Eppendorf AG  
Barkhausenweg 1  
22339 Hamburg  
Germany

---

WARNING: Please also make sure that you remove all restored tips of the given type.

Reply: 1

4:28:30 PM Location scan: Slot B2, height 58.819 mm  
4:28:45 PM Genuine Eppendorf tips found in slot B2  
4:28:58 PM Tip Scan Name: tip300f\_1, Labware: dws/tips/tip300f, Number of tips: 32  
4:29:11 PM New tip acquired from tip300f\_1, A9  
4:29:24 PM Source: SOLVENTS, Position: 3, Well volume: 3254.0µl  
4:29:29 PM Destination: DWP 2mL, Position: A3, Well volume: 1000.0µl  
4:29:29 PM Destination: DWP 2mL, Position: B3, Well volume: 1000.0µl  
4:29:29 PM Destination: DWP 2mL, Position: C3, Well volume: 1000.0µl  
4:29:29 PM Destination: DWP 2mL, Position: D3, Well volume: 1000.0µl  
4:29:29 PM Destination: DWP 2mL, Position: E3, Well volume: 1000.0µl  
4:29:29 PM Destination: DWP 2mL, Position: F3, Well volume: 1000.0µl  
4:29:29 PM Destination: DWP 2mL, Position: G3, Well volume: 1000.0µl  
4:29:29 PM Destination: DWP 2mL, Position: H3, Well volume: 1000.0µl  
4:29:36 PM Tip disposed.  
4:29:44 PM New tip acquired from tip300f\_1, A10  
4:29:57 PM Source: SOLVENTS, Position: 3, Well volume: 1774.0µl  
4:30:02 PM Destination: DWP 2mL, Position: A4, Well volume: 1000.0µl  
4:30:02 PM Destination: DWP 2mL, Position: B4, Well volume: 1000.0µl  
4:30:02 PM Destination: DWP 2mL, Position: C4, Well volume: 1000.0µl  
4:30:02 PM Destination: DWP 2mL, Position: D4, Well volume: 1000.0µl  
4:30:02 PM Destination: DWP 2mL, Position: E4, Well volume: 1000.0µl  
4:30:02 PM Destination: DWP 2mL, Position: F4, Well volume: 1000.0µl  
4:30:02 PM Destination: DWP 2mL, Position: G4, Well volume: 1000.0µl  
4:30:02 PM Destination: DWP 2mL, Position: H4, Well volume: 1000.0µl  
4:30:10 PM Tip disposed.  
4:30:14 PM 9 User Intervention Comment: Cover 2mL DWP with mat  
after that the epMotion will vortex for 10min at 1050 rpm  
Alarm: On  
4:31:14 PM continue  
4:31:14 PM 10 Thermomixer Speed: 1050rpm, Time: 10:00  
Temperature: 8°C  
Current Temperature: 11°C  
4:31:14 PM 11 User InterventionComment: centrifugate 2mL DWP for 5min, 4 C & 5.000 g  
afterwards replace in the epMotion  
Alarm: On  
4:54:42 PM continue  
4:54:40 PM12 Set volume (absolute)



Eppendorf AG  
Barkhausenweg 1  
22339 Hamburg  
Germany

---

Labware: DWP 2mL

Well A1: changed to 1600 µl  
Well A2: changed to 1600 µl  
Well A3: changed to 1600 µl  
Well A4: changed to 1600 µl  
Well A5: changed to 1600 µl  
Well A6: changed to 1600 µl  
Well A7: changed to 1600 µl  
Well A8: changed to 1600 µl  
Well A9: changed to 1600 µl  
Well A10: changed to 1600 µl  
Well A11: changed to 1600 µl  
Well A12: changed to 1600 µl  
Well B1: changed to 1600 µl  
Well B2: changed to 1600 µl  
Well B3: changed to 1600 µl  
Well B4: changed to 1600 µl  
Well B5: changed to 1600 µl  
Well B6: changed to 1600 µl  
Well B7: changed to 1600 µl  
Well B8: changed to 1600 µl  
Well B9: changed to 1600 µl  
Well B10: changed to 1600 µl  
Well B11: changed to 1600 µl  
Well B12: changed to 1600 µl  
Well C1: changed to 1600 µl  
Well C2: changed to 1600 µl  
Well C3: changed to 1600 µl  
Well C4: changed to 1600 µl  
Well C5: changed to 1600 µl  
Well C6: changed to 1600 µl  
Well C7: changed to 1600 µl  
Well C8: changed to 1600 µl  
Well C9: changed to 1600 µl  
Well C10: changed to 1600 µl  
Well C11: changed to 1600 µl  
Well C12: changed to 1600 µl  
Well D1: changed to 1600 µl  
Well D2: changed to 1600 µl  
Well D3: changed to 1600 µl

Well D4: changed to 1600 µl  
Well D5: changed to 1600 µl  
Well D6: changed to 1600 µl  
Well D7: changed to 1600 µl  
Well D8: changed to 1600 µl  
Well D9: changed to 1600 µl  
Well D10: changed to 1600 µl  
Well D11: changed to 1600 µl  
Well D12: changed to 1600 µl  
Well E1: changed to 1600 µl  
Well E2: changed to 1600 µl  
Well E3: changed to 1600 µl  
Well E4: changed to 1600 µl  
Well E5: changed to 1600 µl  
Well E6: changed to 1600 µl  
Well E7: changed to 1600 µl  
Well E8: changed to 1600 µl  
Well E9: changed to 1600 µl  
Well E10: changed to 1600 µl  
Well E11: changed to 1600 µl  
Well E12: changed to 1600 µl  
Well F1: changed to 1600 µl  
Well F2: changed to 1600 µl  
Well F3: changed to 1600 µl  
Well F4: changed to 1600 µl  
Well F5: changed to 1600 µl  
Well F6: changed to 1600 µl  
Well F7: changed to 1600 µl  
Well F8: changed to 1600 µl  
Well F9: changed to 1600 µl  
Well F10: changed to 1600 µl  
Well F11: changed to 1600 µl  
Well F12: changed to 1600 µl  
Well G1: changed to 1600 µl  
Well G2: changed to 1600 µl  
Well G3: changed to 1600 µl  
Well G4: changed to 1600 µl  
Well G5: changed to 1600 µl  
Well G6: changed to 1600 µl  
Well G7: changed to 1600 µl

Eppendorf AG  
Barkhausenweg 1  
22339 Hamburg  
Germany

---

Well G8: changed to 1600 µl  
Well G9: changed to 1600 µl  
Well G10: changed to 1600 µl  
Well G11: changed to 1600 µl  
Well G12: changed to 1600 µl  
Well H1: changed to 1600 µl  
Well H2: changed to 1600 µl  
Well H3: changed to 1600 µl  
Well H4: changed to 1600 µl  
Well H5: changed to 1600 µl  
Well H6: changed to 1600 µl  
Well H7: changed to 1600 µl  
Well H8: changed to 1600 µl  
Well H9: changed to 1600 µl  
Well H10: changed to 1600 µl  
Well H11: changed to 1600 µl  
Well H12: changed to 1600 µl

4:54:42 PM 13 Sample Transfer

Source:

Name: DWP 2mL, Labware: dws/plates/dwp96/EP\_DWP\_2000\_1

Destination:

Name: DWP\_1mL, Labware: dws/plates/dwp96/EP\_DWP\_1000\_1

Number of samples: 32, replicates: 1

Tool: TM\_1000\_8, Filter tips: Yes, Liquid: Alcohol 98%

Volume: 750µl, Transfer type: Pipette

Change tips: before each aspiration

Dispose tips into waste.

Options: aspirate 19 mm from well bottom, move -8 mm during aspiration

Changes in liquid types:

Speed aspiration: 1.0mm/sec, Speed dispense: 4.0mm/sec

Liquid offset aspiration: 3.0mm, Liquid offset dispense: -3.0mm

Delay blow: 0ms, Speed blow: 0.4mm/sec

Movement blow: 0%, Initial stroke: 100%

Prewetting: 0 cycles

4:55:02 PM New tip acquired from tip1000f\_1, A12

4:55:23 PM Source: DWP 2mL, Position: A1, Well volume: 850.0µl

4:55:23 PM Source: DWP 2mL, Position: B1, Well volume: 850.0µl

4:55:23 PM Source: DWP 2mL, Position: C1, Well volume: 850.0µl

4:55:23 PM Source: DWP 2mL, Position: D1, Well volume: 850.0µl

4:55:23 PM Source: DWP 2mL, Position: E1, Well volume: 850.0µl

Eppendorf AG  
Barkhausenweg 1  
22339 Hamburg  
Germany

---

4:55:23 PM Source: DWP 2mL, Position: F1, Well volume: 850.0µl  
4:55:23 PM Source: DWP 2mL, Position: G1, Well volume: 850.0µl  
4:55:23 PM Source: DWP 2mL, Position: H1, Well volume: 850.0µl  
4:55:31 PM Destination: DWP\_1mL, Position: A1, Well volume: 750.0µl  
4:55:31 PM Destination: DWP\_1mL, Position: B1, Well volume: 750.0µl  
4:55:31 PM Destination: DWP\_1mL, Position: C1, Well volume: 750.0µl  
4:55:31 PM Destination: DWP\_1mL, Position: D1, Well volume: 750.0µl  
4:55:31 PM Destination: DWP\_1mL, Position: E1, Well volume: 750.0µl  
4:55:31 PM Destination: DWP\_1mL, Position: F1, Well volume: 750.0µl  
4:55:31 PM Destination: DWP\_1mL, Position: G1, Well volume: 750.0µl  
4:55:31 PM Destination: DWP\_1mL, Position: H1, Well volume: 750.0µl  
4:55:36 PM Tip disposed.  
4:55:53 PM !Dialog           Text: Please insert new tips for 1000 µl with filter in slot  
A2 (tip1000f\_1)

WARNING: Please also make sure that you remove all restored tips of the given type.

Reply: 1

4:56:05 PM Location scan:   Slot A2, height 99.766 mm  
4:56:20 PM Genuine Eppendorf tips found in slot A2  
4:56:32 PM Tip Scan       Name: tip1000f\_1, Labware: dws/tips/tip1000f, Number of tips: 96  
4:56:43 PM New tip acquired from tip1000f\_1, A1  
4:57:04 PM Source: DWP 2mL, Position: A2, Well volume: 850.0µl  
4:57:04 PM Source: DWP 2mL, Position: B2, Well volume: 850.0µl  
4:57:04 PM Source: DWP 2mL, Position: C2, Well volume: 850.0µl  
4:57:04 PM Source: DWP 2mL, Position: D2, Well volume: 850.0µl  
4:57:04 PM Source: DWP 2mL, Position: E2, Well volume: 850.0µl  
4:57:04 PM Source: DWP 2mL, Position: F2, Well volume: 850.0µl  
4:57:04 PM Source: DWP 2mL, Position: G2, Well volume: 850.0µl  
4:57:04 PM Source: DWP 2mL, Position: H2, Well volume: 850.0µl  
4:57:12 PM Destination: DWP\_1mL, Position: A2, Well volume: 750.0µl  
4:57:12 PM Destination: DWP\_1mL, Position: B2, Well volume: 750.0µl  
4:57:12 PM Destination: DWP\_1mL, Position: C2, Well volume: 750.0µl  
4:57:12 PM Destination: DWP\_1mL, Position: D2, Well volume: 750.0µl  
4:57:12 PM Destination: DWP\_1mL, Position: E2, Well volume: 750.0µl  
4:57:12 PM Destination: DWP\_1mL, Position: F2, Well volume: 750.0µl  
4:57:12 PM Destination: DWP\_1mL, Position: G2, Well volume: 750.0µl  
4:57:12 PM Destination: DWP\_1mL, Position: H2, Well volume: 750.0µl  
4:57:17 PM Tip disposed.  
4:57:24 PM New tip acquired from tip1000f\_1, A2  
4:57:46 PM Source: DWP 2mL, Position: A3, Well volume: 850.0µl

Eppendorf AG  
Barkhausenweg 1  
22339 Hamburg  
Germany

---

4:57:46 PM Source: DWP 2mL, Position: B3, Well volume: 850.0µl  
4:57:46 PM Source: DWP 2mL, Position: C3, Well volume: 850.0µl  
4:57:46 PM Source: DWP 2mL, Position: D3, Well volume: 850.0µl  
4:57:46 PM Source: DWP 2mL, Position: E3, Well volume: 850.0µl  
4:57:46 PM Source: DWP 2mL, Position: F3, Well volume: 850.0µl  
4:57:46 PM Source: DWP 2mL, Position: G3, Well volume: 850.0µl  
4:57:46 PM Source: DWP 2mL, Position: H3, Well volume: 850.0µl  
4:57:53 PM Destination: DWP\_1mL, Position: A3, Well volume: 750.0µl  
4:57:53 PM Destination: DWP\_1mL, Position: B3, Well volume: 750.0µl  
4:57:53 PM Destination: DWP\_1mL, Position: C3, Well volume: 750.0µl  
4:57:53 PM Destination: DWP\_1mL, Position: D3, Well volume: 750.0µl  
4:57:53 PM Destination: DWP\_1mL, Position: E3, Well volume: 750.0µl  
4:57:53 PM Destination: DWP\_1mL, Position: F3, Well volume: 750.0µl  
4:57:53 PM Destination: DWP\_1mL, Position: G3, Well volume: 750.0µl  
4:57:53 PM Destination: DWP\_1mL, Position: H3, Well volume: 750.0µl  
4:57:59 PM Tip disposed.  
4:58:06 PM New tip acquired from tip1000f\_1, A3  
4:58:27 PM Source: DWP 2mL, Position: A4, Well volume: 850.0µl  
4:58:27 PM Source: DWP 2mL, Position: B4, Well volume: 850.0µl  
4:58:27 PM Source: DWP 2mL, Position: C4, Well volume: 850.0µl  
4:58:27 PM Source: DWP 2mL, Position: D4, Well volume: 850.0µl  
4:58:27 PM Source: DWP 2mL, Position: E4, Well volume: 850.0µl  
4:58:27 PM Source: DWP 2mL, Position: F4, Well volume: 850.0µl  
4:58:27 PM Source: DWP 2mL, Position: G4, Well volume: 850.0µl  
4:58:27 PM Source: DWP 2mL, Position: H4, Well volume: 850.0µl  
4:58:35 PM Destination: DWP\_1mL, Position: A4, Well volume: 750.0µl  
4:58:35 PM Destination: DWP\_1mL, Position: B4, Well volume: 750.0µl  
4:58:35 PM Destination: DWP\_1mL, Position: C4, Well volume: 750.0µl  
4:58:35 PM Destination: DWP\_1mL, Position: D4, Well volume: 750.0µl  
4:58:35 PM Destination: DWP\_1mL, Position: E4, Well volume: 750.0µl  
4:58:35 PM Destination: DWP\_1mL, Position: F4, Well volume: 750.0µl  
4:58:35 PM Destination: DWP\_1mL, Position: G4, Well volume: 750.0µl  
4:58:35 PM Destination: DWP\_1mL, Position: H4, Well volume: 750.0µl  
4:58:40 PM Tip disposed.  
Tip usage summary:  
tip1000f : 40  
tip300f : 40  
4:58:59 PM Application ended Application ended successfully

-----  
Eppendorf epMotion

End of log

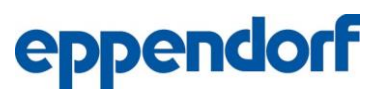

9/13/2022

Eppendorf AG  
Barkhausenweg 1  
22339 Hamburg  
Germany

---
